# Supplementary material for: Modulation of Brain Electroencephalography Oscillations by Electroacupuncture in a Rat Model of Postincisional Pain
Source: Hindawi journal article supplement (doi:10.1155/2013/160357), 2013-01-01

## Figure legends

FIGURE S1: Spatial distribution of the electrodes.

FIGURE S2: Comparison of absolute power during the first two sessions between EA and restriction group. (A) Comparison of power values during the session before the incision between two groups. No significant differences were found across different frequency bands. (B) Comparison of power values during the session after the incision between two groups. No difference was presented in any bands.  $n = 8$ .

FIGURE S3: Phase couplings at different frequency bands: statistical analysis of the filtered wavelet bicoherence (FIWBIC) values after the restriction in the post-incisional pain model of rats. Boxplots stand for the phase coupling at local frequency bands, and the Y-axis represents the mean of synchronization. After restriction, the synchronization values among all frequency bands did not show any significant change. Wilcoxon rank-sum test was used.  $n = 8$ .

FIGURE S1

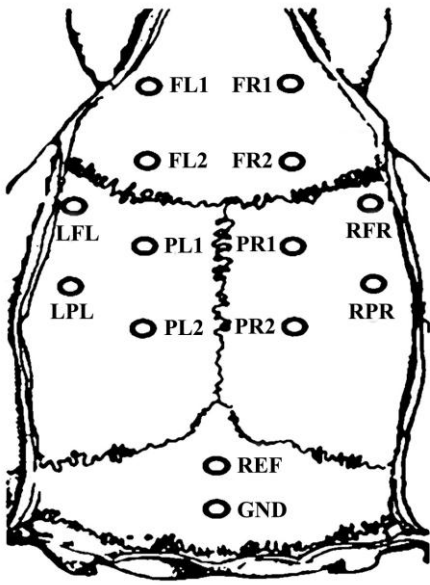

FIGURE S2

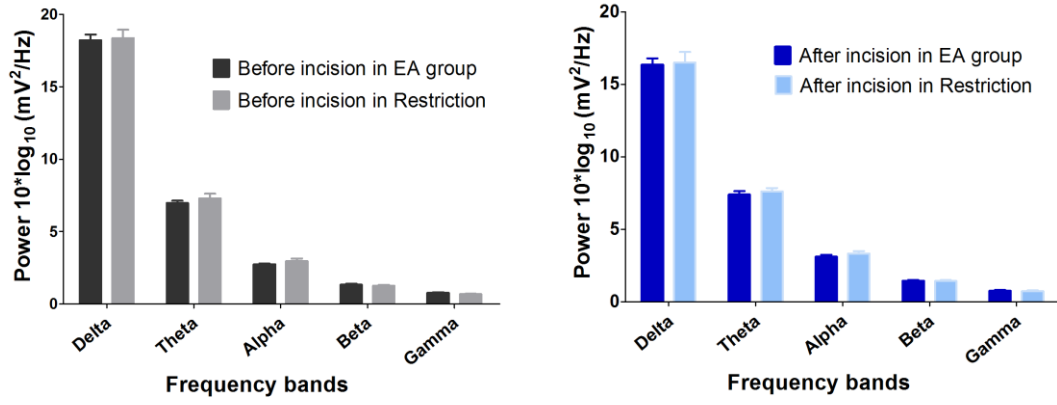

FIGURE S3

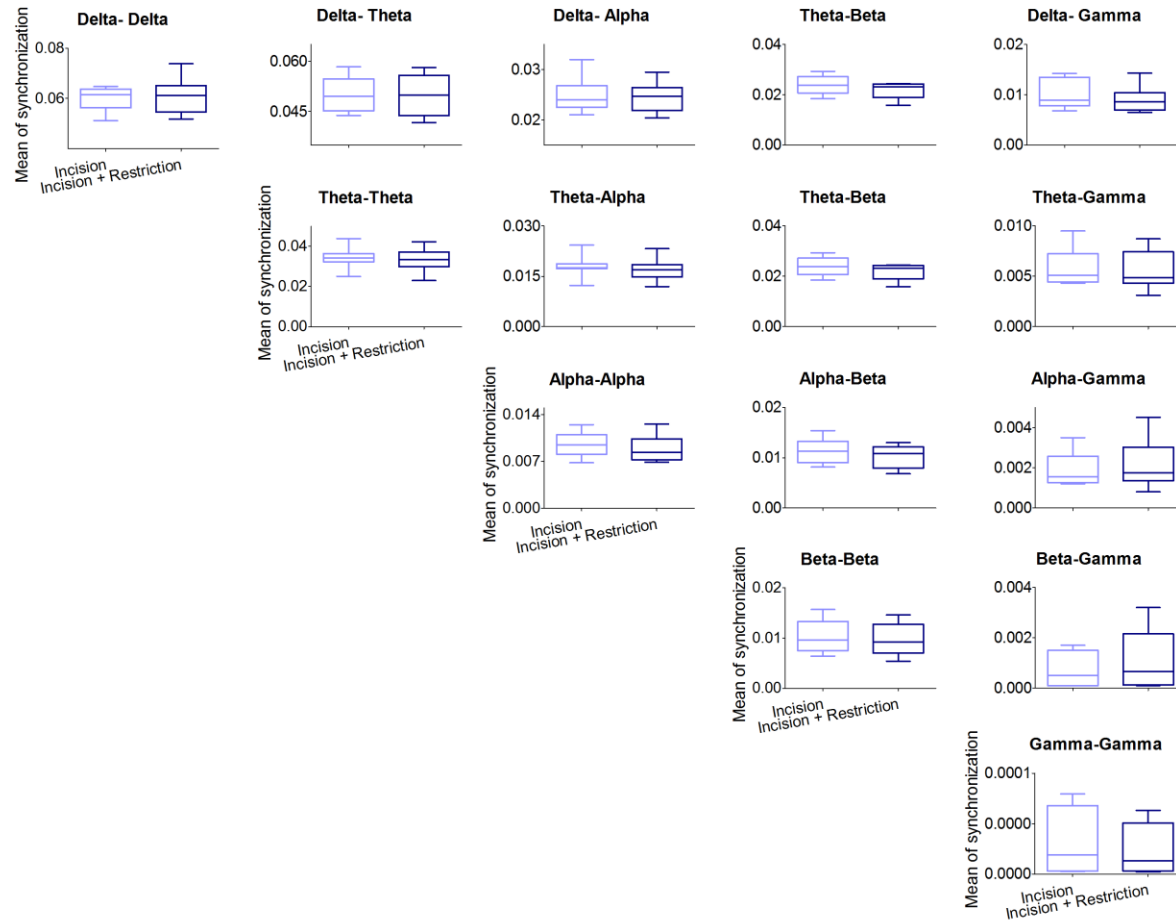

Supplement: f1 [file 160357.f1.pdf]
